# Supplementary material
Source: PubMed Central journal article supplement (PMC3917987)
Supplement: rna-10-1842-s01.pdf [file rna-10-1842-s01.pdf]

## **Supplemental Material to:**

**Ivan Dotu, Gloria Lozano, Peter Clote,  
and Encarnacion Martinez-Salas**

**Using RNA Inverse Folding to identify  
IRES-like structural subdomains**

**2013; 10(11)**

**<http://dx.doi.org/10.4161/rna.26994>**

**[www.landesbioscience.com/journals/rnabiology/article/26994/](http://www.landesbioscience.com/journals/rnabiology/article/26994/)**

## Supplementary information

**Supplementary Table 1. Hits retrieved using RNA Inverse Folding following pipeline filters**

| <b>GenBank accession number</b> | <b>Organism</b>                | <b>Gene</b>   | <b>Region</b> | <b>Nt length</b> | <b>E-value</b> | <b>Nt Id* (%)</b> | <b>Function</b>                                                      |
|---------------------------------|--------------------------------|---------------|---------------|------------------|----------------|-------------------|----------------------------------------------------------------------|
| NM_079437.3                     | <i>Drosophila melanogaster</i> | TAF6          | Coding region | 36               | 2.7            | 79                | Transcription factor TFIID assoc. protein 6                          |
| NM_214436.1                     | <i>Sus scrofa</i>              | ST6GAL NAC-V  | Coding region | 43               | 0.016          | 91                | Adds sialic acid in $\alpha$ 2,6 linkage to GalNAc                   |
| NM_001205770.1                  | <i>Bos taurus</i>              | TNFSF11       | Coding region | 38               | 0.97           | 88                | Tumor necrosis factor ligand superfamily member 11                   |
| NM_007496.2                     | <i>Mus musculus</i>            | Zfx3          | 5' UTR        | 38               | 0.97           | 84                | Zinc finger homeobox protein 3                                       |
| NM_177289.1                     | <i>Mus musculus</i>            | Cbfa2t3       | 5' UTR        | 36               | 2.7            | 85                | Core-binding factor, runt domain, alpha subunit 2, translocated to 3 |
| AY005471.1                      | <i>Rattus norvegicus</i>       | bZip TF c-maf | 5' UTR        | 36               | 2.7            | 76                | bZip transcription factor c-maf                                      |

\* Nt Id: nucleotide identity



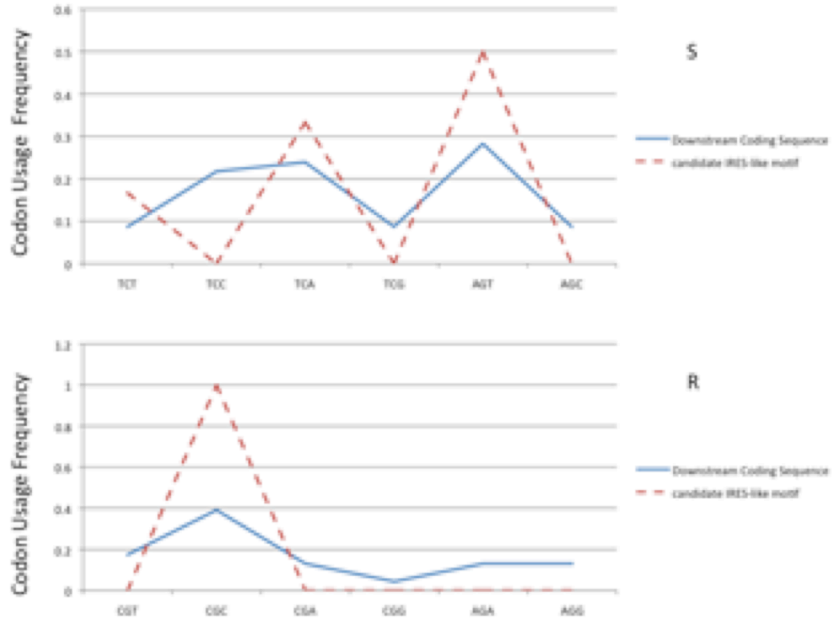

**Supplementary Figure 2.** Codon usage distributions for region 325 to 522. X axis correspond to each synonymous codon and Y axis plots relative frequency of the codons in the region. IRES is used to indicate the candidate IRES-like motif and Protein for the corresponding downstream coding sequence. Upper graph is for serine (S), lower graph is for arginine (R).

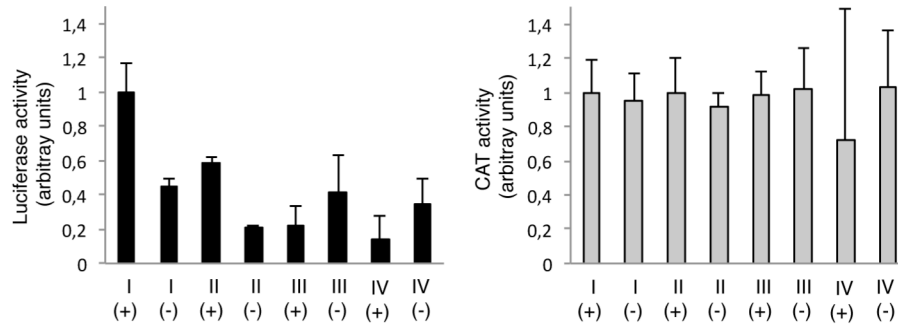

**Supplementary Figure 3.** Luciferase and CAT activities measured with bicistronic constructs bearing regions I, II, III, or IV in either sense (+) or antisense (-) orientation observed in BHK-21 cells transfected with the corresponding bicistronic constructs. Values (mean±sd) were made relative to that of region I(+). Experiments were done in triplicate wells in at least three independent assays.

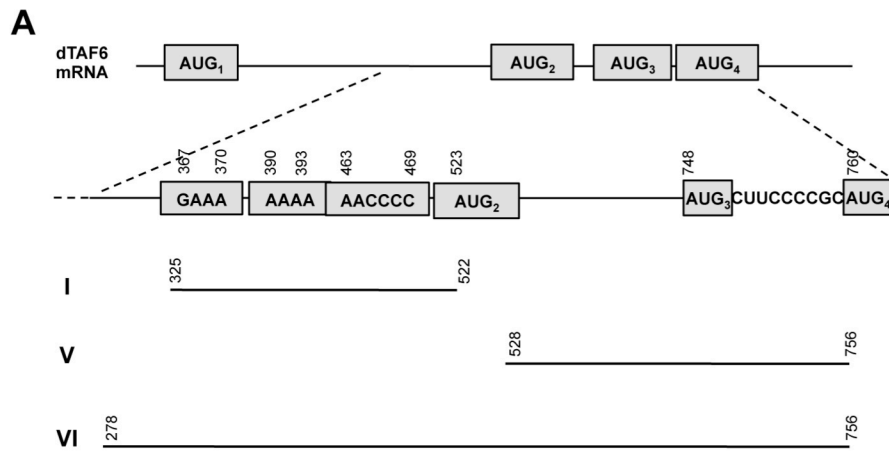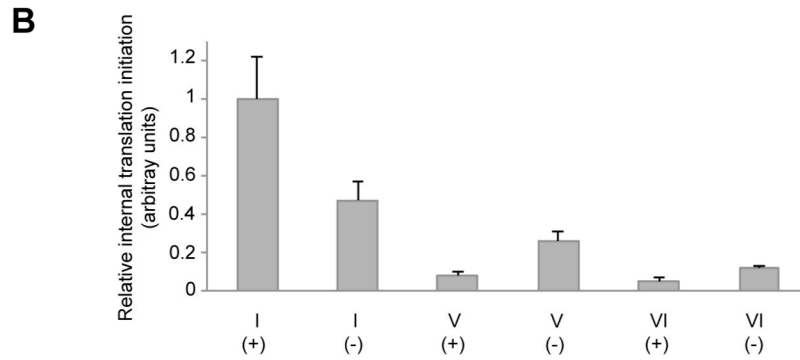

**Supplementary Figure 4.** (A). Schematic representation of *Drosophila melanogaster* TAF6 mRNA, with indications of regions I, V and VI. Nucleotides numbers are referred to the A of AUG<sub>1</sub>. (B). Relative internal initiation of translation of regions V and VI in either sense (+) or antisense (-) orientation relative to region I observed in BHK-21 cells transfected with the corresponding bicistronic constructs. Values represent the mean±sd obtained in at three independent assays.
